# Supplementary material
Source: Springer Nature journal article supplement (http://www.springermedizin.de/resource/supplementary/13046_2010_443_MOESM4_ESM.pdf/9662240)
Supplement: MOESM4 [file 9662240]

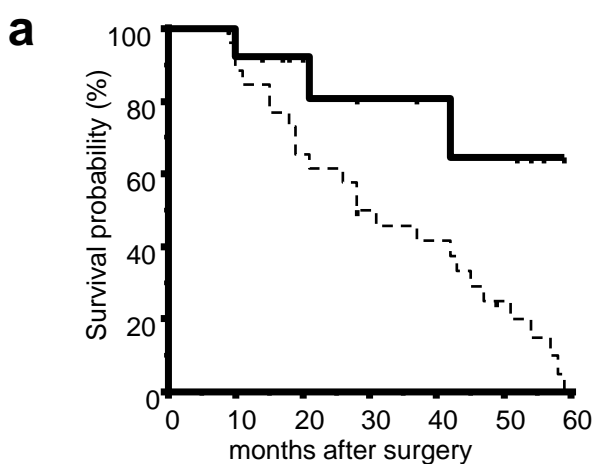

|             |    |    |   |   |   |   |   |
|-------------|----|----|---|---|---|---|---|
| No. at risk | 14 | 12 | 8 | 6 | 5 | 4 | 1 |
| (Lgr5 low)  |    |    |   |   |   |   |   |

|             |    |    |    |    |    |   |   |
|-------------|----|----|----|----|----|---|---|
| No. at risk | 27 | 24 | 18 | 13 | 10 | 5 | 1 |
| (Lgr5 high) |    |    |    |    |    |   |   |

Lgr5 expression in Barrett's esophagus (BE)

— low

- - - high

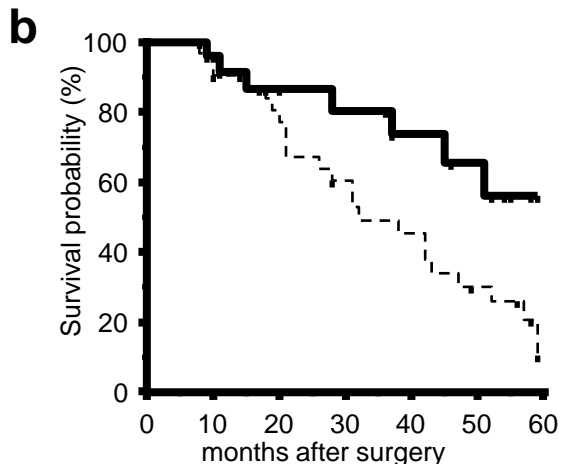

|             |    |    |    |    |   |   |   |
|-------------|----|----|----|----|---|---|---|
| No. at risk | 28 | 21 | 14 | 13 | 9 | 7 | 0 |
| (Lgr5 low)  |    |    |    |    |   |   |   |

|             |    |    |    |    |    |   |   |
|-------------|----|----|----|----|----|---|---|
| No. at risk | 32 | 28 | 23 | 16 | 12 | 7 | 0 |
| (Lgr5 high) |    |    |    |    |    |   |   |

Lgr5 expression all EACs

— low

- - - high
